# Supplementary material
Source: publisher figshare collection journal article supplement (https://acs.figshare.com/ndownloader/files/9787918)
Supplement: Supplementary file 1 [file 9787918]

## Supporting Information

of

### Intelligent “Peptide-gathering Mechanical Arm” Tames Wild “Trojan-Horse” Peptides for the Controlled Delivery of Cancer Nanotherapeutics

Nian-Qiu Shi <sup>a, b \*</sup>, Yan Li <sup>c</sup>, Yong Zhang <sup>d</sup>, Nan Shen <sup>e</sup>, Ling Qi <sup>e</sup>, Shu-Ran Wang <sup>f</sup>,

Xian-Rong Qi <sup>g</sup>

**a** *School of Pharmacy, Jilin Medical University, Jilin City, 132013, Jilin Province, China.*

**b** *State Key Laboratory of Medicinal Chemical Biology, Nankai University, Tianjin City, 300071, China.*

**c** *Immunology Department, Laboratory Medical College, Jilin Medical University, Jilin City, 132013, Jilin Province, China.*

**d** *College of Life Science, Jilin University, 2699 Qianjin Street, Changchun City, 130012, Jilin Province, China*

**e** *Basic College of Medicine, Jilin Medical University, Jilin City, 132013, Jilin Province, China.*

**f** *School of Public Health, Jilin Medical University, Jilin City, 132013, Jilin Province, China.*

**g** *Department of Pharmaceutics, School of Pharmaceutical Science, Peking University, Beijing City, 100191, China.*

\* Corresponding author: Nian-Qiu Shi. Ph D, Associated professor. Department of Pharmaceutics, School of Pharmacy, Jilin Medical University, 5 Jilin Street, Fengman District, Jilin City, 132013, Jilin Province, China. Tel: +86 0432 64560528, Email: shinianqiu2009@163.com.

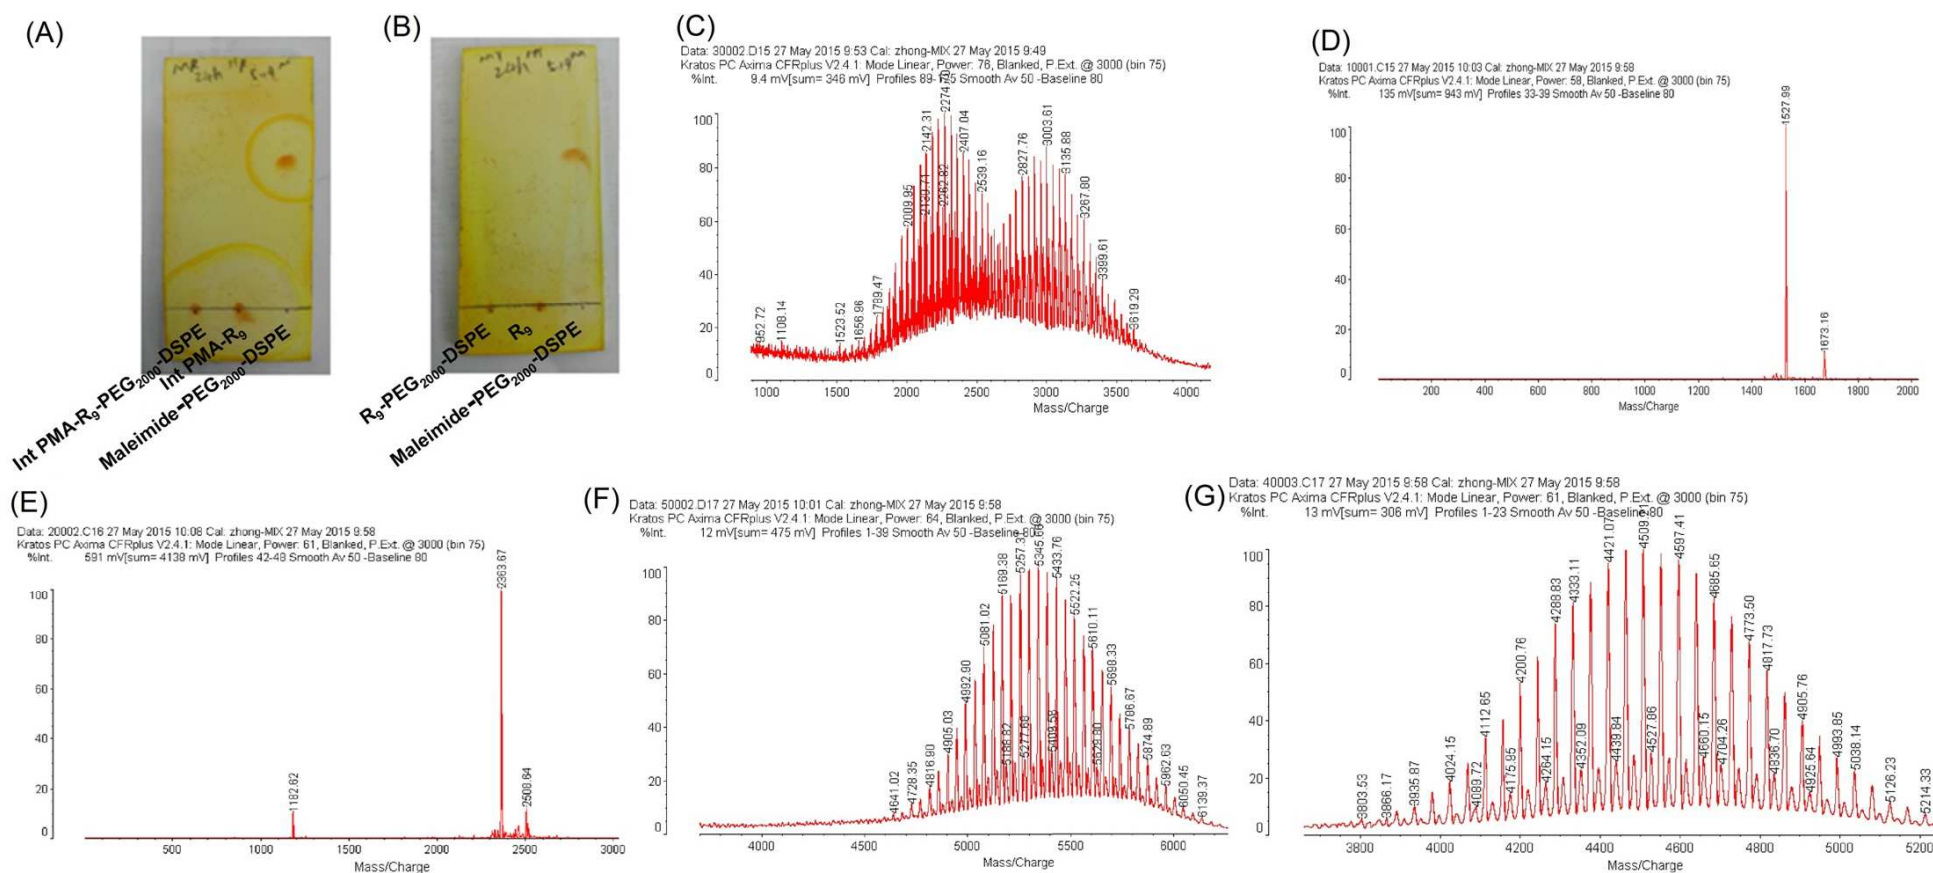

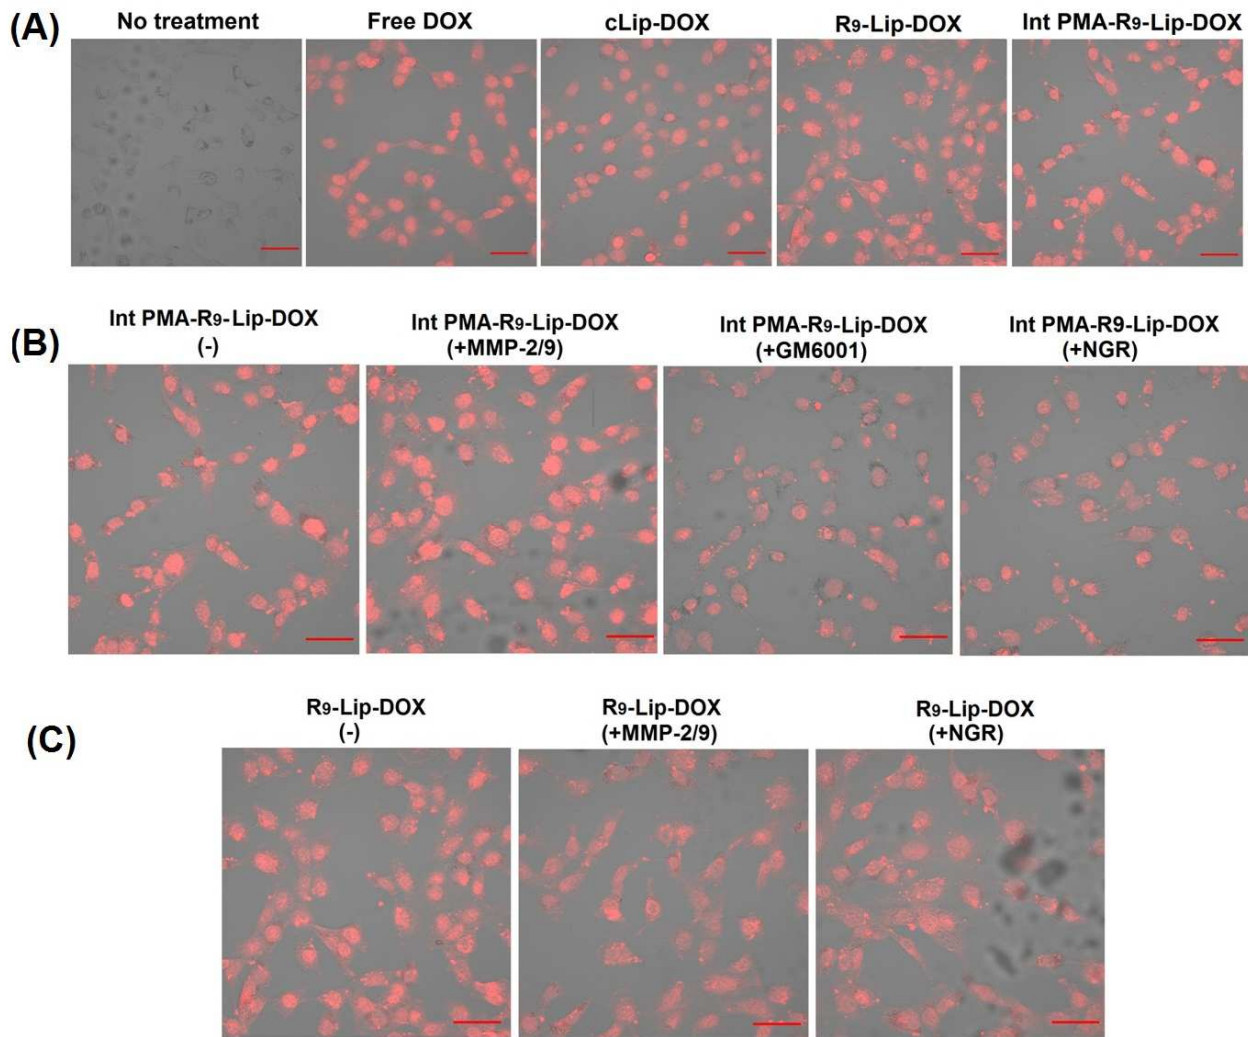

**Figure S-2.** Cell uptake visualized using confocal laser scanning microscopy (CLSM) under endogenous or exogenous triggers. **(A)** CLSM images of HT-1080 cells were recorded after incubation with free DOX, cLip-DOX, R<sub>9</sub>-Lip-DOX and Int PMA-R<sub>9</sub>-Lip-DOX (DOX 2.5 μg/mL) at 37 °C for 24 h. **(B)** CLSM images of HT-1080 cells was recorded after incubation with Int PMA-R<sub>9</sub>-Lip-DOX (DOX 2.5 μg/mL) at 37 °C for 24 h after 4 h of pre-incubation of 0.1 mg/mL MMP-2/9, 250 ng/mL GM6001 or 0.1 mg/mL NGR. **(C)** CLSM images of HT-1080 cells were recorded after incubation with R<sub>9</sub>-Lip-DOX (DOX 2.5 μg/mL). HT-1080 cells were pre-incubated with excess MMP-2/9 or NGR for 4h followed by co-incubation with R<sub>9</sub>-Lip-DOX for another 24 h. Cells were fixed with 4% paraformaldehyde. DOX fluorescence (Red) was recorded. All images were taken under identical instrumental conditions and presented at the same intensity. Scale bar, 50 μm.

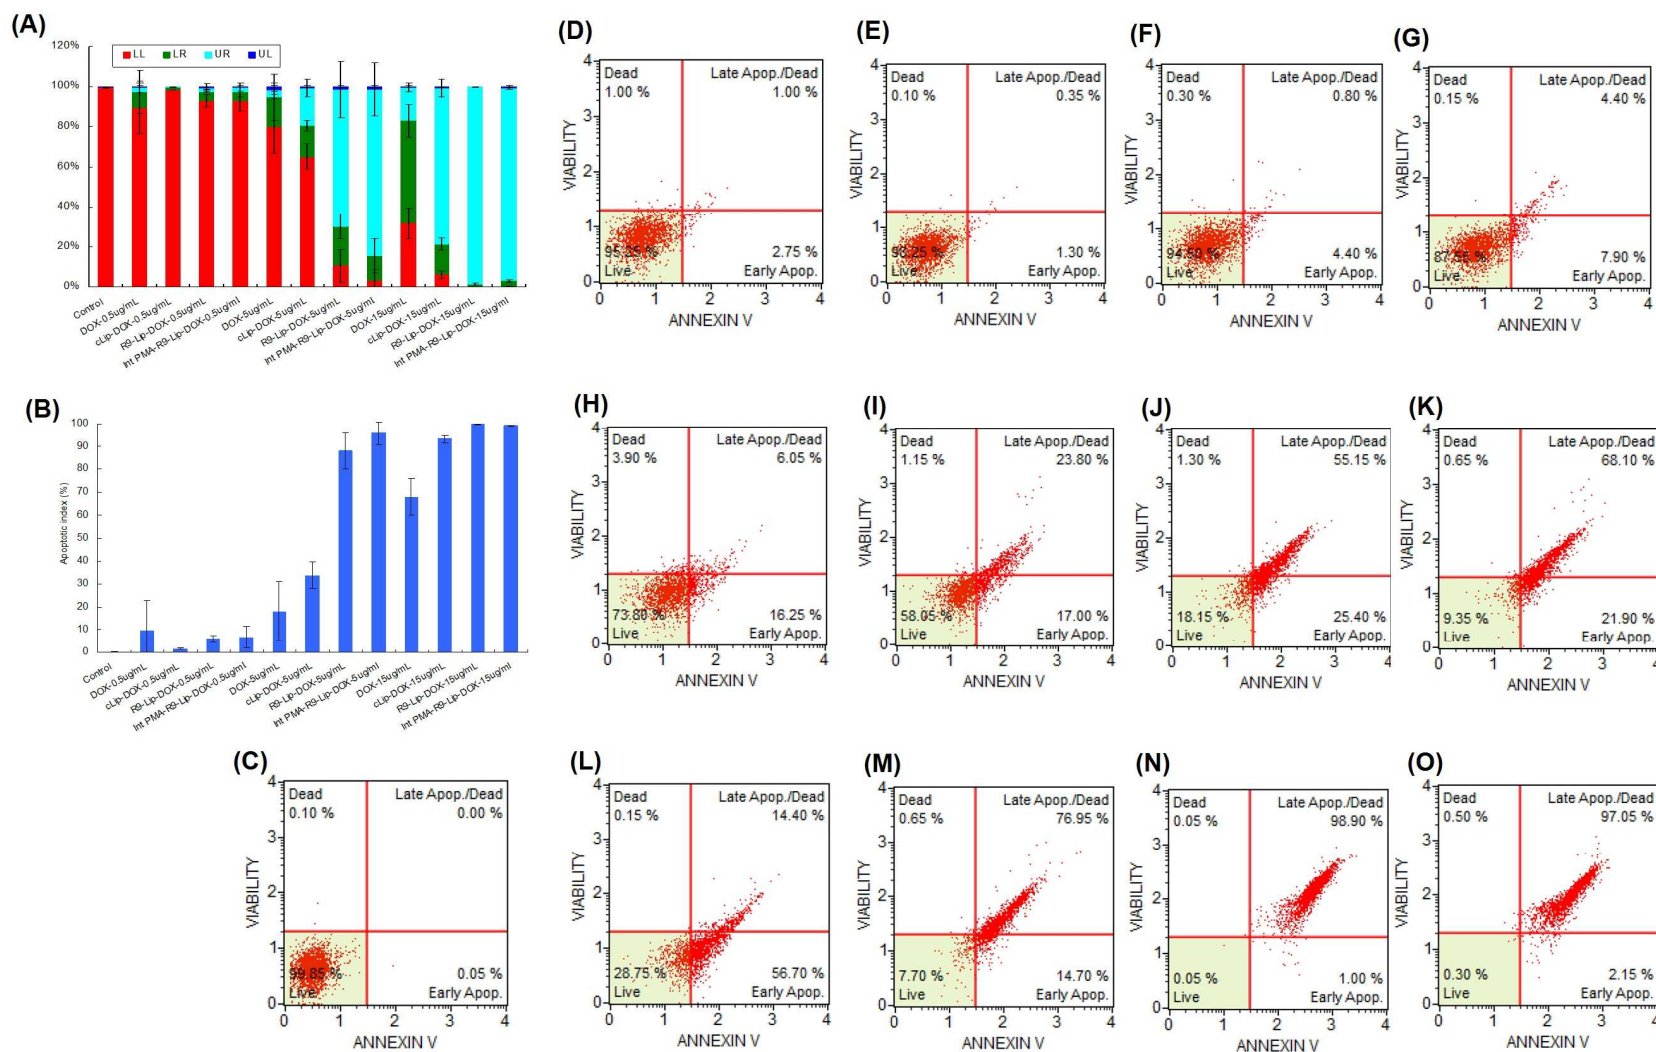

**Figure S-3.** (A) *In vitro* cell apoptosis was evaluated for various DOX formulations in HT-1080 cells. UL: live cells; UR: early apoptotic cells; LR: late apoptotic cells; LL: necrotic cells. (B) Apoptotic indexes were calculated in HT-1080 cells for each group. (C-O) Representative cell apoptotic diagrams were detected by flow cytometry. Cells were treated with DOX in solution or in DOX-loaded liposomes containing total DOX concentrations of 0.5, 5 and 15 µg/mL for 24 h. These representative diagrams included non-treatment group (control, C), 0.5 µg/mL of DOX (D), cLip-DOX (E) R<sub>9</sub>-Lip-DOX (F) and Int PMA-R<sub>9</sub>-Lip-DOX (G), 5 µg/mL of DOX (H), cLip-DOX (I), R<sub>9</sub>-Lip-DOX (J) and Int PMA-R<sub>9</sub>-Lip-DOX (K), and 15µg/mL of DOX (L), cLip-DOX (M), R<sub>9</sub>-Lip-DOX (N) and Int PMA-R<sub>9</sub>-Lip-DOX (O). Data are shown as the mean ± SD (n = 3).



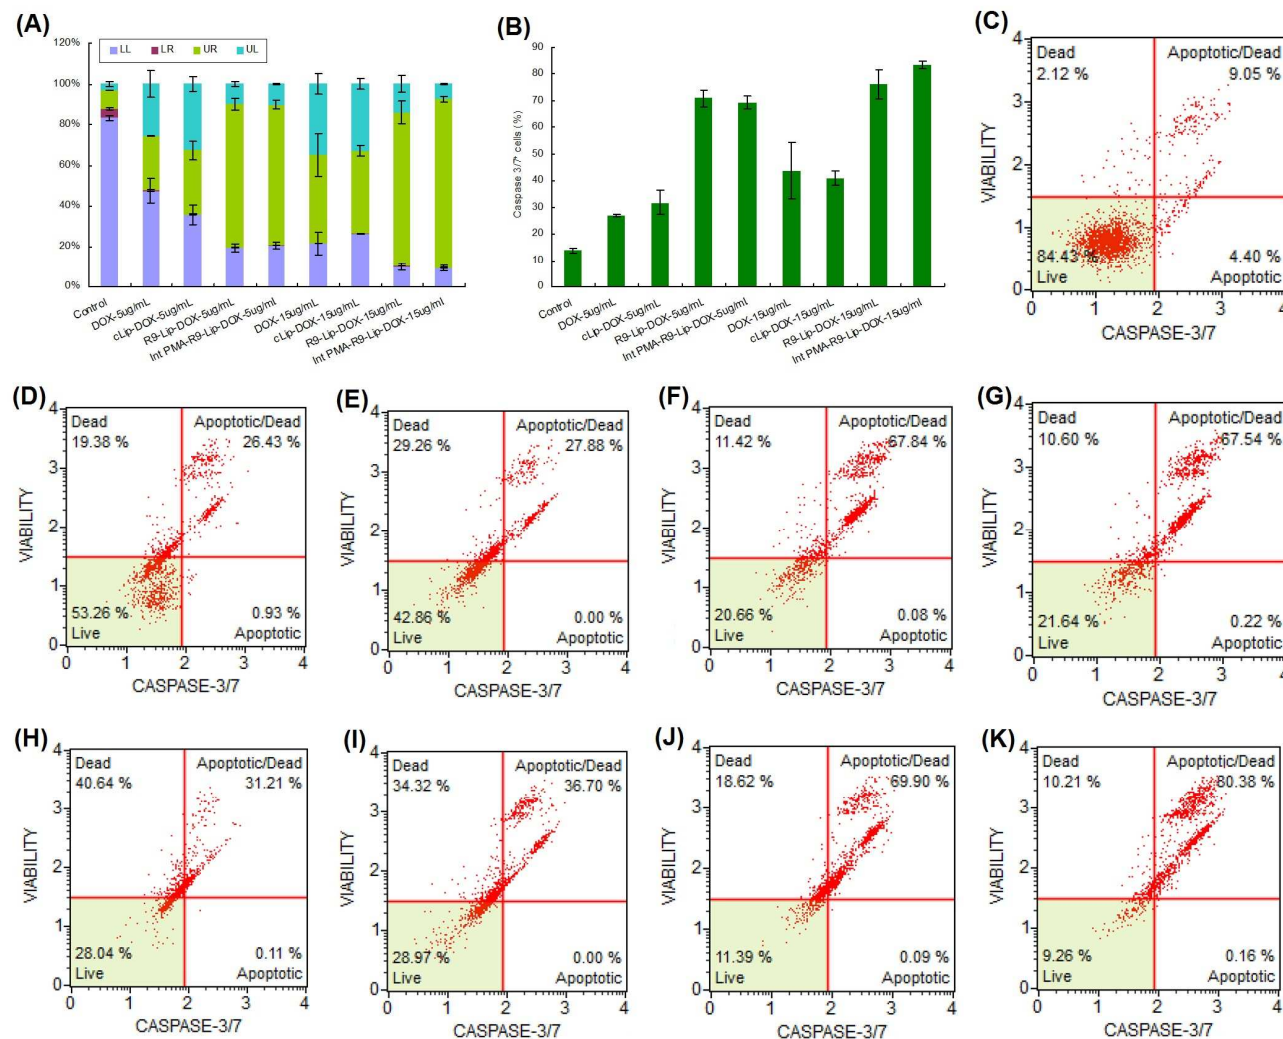

**Figure S-4.** (A) Caspase 3/7-induced cell apoptosis was evaluated for various DOX formulations in HT-1080 cells. (B) Caspase 3/7 activation was calculated in HT-1080 cells for each group. UL: live cells; UR: apoptotic cells; LR: apoptotic/dead cells; LL: dead cells. (C-K) Representative caspase 3/7-induced cell apoptotic diagrams were detected by flow cytometry. Cells were treated with DOX in solution or in DOX-loaded liposomes containing total DOX concentrations of 5 and 15 µg/mL for 24 h. These representative diagrams included non-treatment group (control, C), 5 µg/mL of DOX (D), cLip-DOX (E) R<sub>9</sub>-Lip-DOX (F) and Int PMA-R<sub>9</sub>-Lip-DOX (G), 15 µg/mL of DOX (H), cLip-DOX (I), R<sub>9</sub>-Lip-DOX (J) and Int PMA-R<sub>9</sub>-Lip-DOX (K). Data are shown as the mean ± SD (n = 3).
